# Supplementary material for: Autistic Traits in Neurotypical Adults: Correlates of Graph Theoretical Functional Network Topology and White Matter Anisotropy Patterns
Source: PubMed Central journal article supplement (PMC3618514; doi:10.1371/journal.pone.0060982), 2013-04-05
Supplement: pone.0060982.s003.pdf [file pone.0060982.s003.pdf]

---

**Algorithm 1** Pseudo code of cost integration method

---

```
1: procedure COSTINTEGRATION(WeightedNetwork, CostRange, Repetition)
2:    $r \leftarrow \text{Repetition}$ 
3:   while  $r \neq 0$  do
4:      $cost \leftarrow \text{random value from CostRange}$ 
5:      $BinaryNetwork \leftarrow \text{WeightedNetwork}(cost)$ 
6:      $k_i^{cost} \leftarrow \text{all nodes of BinaryNetwork}$ 
7:      $e_i^{cost} \leftarrow \text{all nodes of BinaryNetwork}$ 
8:      $Eg^{cost} \leftarrow \text{BinaryNetwork}$ 
9:      $El^{cost} \leftarrow \text{BinaryNetwork}$ 
10:     $r \leftarrow r - 1$ 
11:  end while
12:   $k_i^* \leftarrow \sum k_i^{cost}$ 
13:   $e_i^* \leftarrow \sum e_i^{cost}$ 
14:   $Eg^* \leftarrow \sum Eg^{cost}$ 
15:   $El^* \leftarrow \sum El^{cost}$ 
16:  return  $k_i^*, e_i^*, Eg^*, El^*$ 
17: end procedure
```

---
